# Supplementary material for: Anxiolytic management in eating disorder patients receiving cognitive behavioral therapy: A quality improvement brief report
Source: bioRxiv or medRxiv preprint supplement (doi:10.1101/2024.11.25.24317936), 2024-12-07
Supplement: Supplementary file [file media-1.pdf]

**Supplementary Table 1. Anxiolytic medications during treatment.**

|             | <b>mean days (SEM) [range days], n</b> |
|-------------|----------------------------------------|
| Alprazolam  | 36.4 (5.1) [2 – 76], 6                 |
| Clonazepam  | 35.2 (4.0) [1 – 112], 17               |
| Diazepam    | 32.9 (8.4) [1 – 50], 2                 |
| Gabapentin  | 20.1 (2.0) [1 – 87], 37                |
| Hydroxyzine | 27.4 (2.2) [1 – 141], 68               |
| Lorazepam   | 30.4 (3.4) [1 – 98], 21                |
